# Supplementary material for: Chlorthalidone vs Hydrochlorothiazide for Hypertension Treatment After Myocardial Infarction or Stroke: A Secondary Analysis of a Randomized Clinical Trial
Source: PubMed Central journal article supplement (PMC11094558; doi:10.1001/jamanetworkopen.2024.11081), 2024-05-14

## Supplementary Online Content

Ishani A, Hau C, Cushman WC, et al. Chlorthalidone vs hydrochlorothiazide for hypertension treatment after myocardial infarction or stroke: a secondary analysis of a randomized clinical trial. *JAMA Netw Open*. 2024;7(5):e2411081. doi:10.1001/jamanetworkopen.2024.11081

**eTable 1.** Demographic and Baseline Information by Prior MI or Stroke Status

**eTable 2.** Use of Selected Medications Over Time

**eFigure 1.** CONSORT Diagram by MI or Stroke Subgroup

**eFigure 2.** Forest Plot by MI or Stroke Subgroup

This supplementary material has been provided by the authors to give readers additional information about their work.

**eTable 1. Demographic and Baseline Information by MI/stroke subgroup**

|                                                          | With prior MI/stroke<br>(n=1,455) | Without prior MI/stroke<br>(n=12,068) |
|----------------------------------------------------------|-----------------------------------|---------------------------------------|
| Age, yrs - median (IQR)                                  | 72 (69 - 76)                      | 71 (69 - 75)                          |
| Sex                                                      |                                   |                                       |
| Female - n (%)                                           | 31 (3.3)                          | 400 (3.3)                             |
| Male - n (%)                                             | 1,424 (97.9)                      | 11,668 (96.7)                         |
| Race - n (%)                                             |                                   |                                       |
| Black or African American                                | 286 (19.7)                        | 1,741 (14.4)                          |
| White                                                    | 1,061 (72.9)                      | 9,393 (77.8)                          |
| Other <sup>a</sup>                                       | 37 (2.5)                          | 287 (2.4)                             |
| Unknown due to missing data                              | 71 (4.9)                          | 647 (5.4)                             |
| Not Hispanic or Latino - n (%)                           | 1,352 (92.9)                      | 11,197 (92.8)                         |
| Resided in rural areas <sup>b</sup> - n (%) <sup>a</sup> | 615 (42.3)                        | 5,507 (45.6)                          |
| BMI, kg/m <sup>2</sup> - median (IQR)                    | 30 (27 - 34)                      | 31 (28 - 35)                          |
| Medical History - n (%)                                  |                                   |                                       |
| Diabetes                                                 | 783 (53.8)                        | 5,246 (43.5)                          |
| Heart failure                                            | 241 (16.6)                        | 810 (6.7)                             |
| Myocardial infarction                                    | 488 (33.5)                        | ---                                   |
| Stroke                                                   | 1,029 (70.7)                      | ---                                   |
| Estimated GFR <60 ml/min/1.73m <sup>2</sup>              | 427 (30.9)                        | 2,670 (23.5)                          |
| Current smoker - n (%)                                   | 421 (30.8)                        | 2,536 (22.5)                          |
| HCTZ 25 mg - n (%)                                       | 1,378 (94.7)                      | 11,403 (94.5)                         |
| Systolic blood pressure, mmHg - median (IQR)             | 136 (129 - 148)                   | 136 (129 - 146)                       |
| Antihypertensive drug use, median (IQR)                  | 3 (2 - 4)                         | 3 (2 - 3)                             |
| Antihypertensive drug use - n (%)                        |                                   |                                       |
| HCTZ alone                                               | 101 (6.9)                         | 1,654 (13.7)                          |
| HCTZ plus 1 additional BP med                            | 392 (26.9)                        | 4,244 (35.2)                          |
| HCTZ plus 2 additional BP meds                           | 535 (36.8)                        | 3,866 (32.0)                          |
| HCTZ plus 3 additional BP meds                           | 334 (23.0)                        | 1,817 (15.1)                          |
| HCTZ plus 4 additional BP meds                           | 93 (6.4)                          | 487 (4.0)                             |
| Other drug use - n (%)                                   |                                   |                                       |
| ACE inhibitor or ARB                                     | 1,005 (69)                        | 7,744 (64)                            |
| Loop diuretic                                            | 46 (3)                            | 265 (2)                               |
| SGLT-2 inhibitor                                         | 63 (4)                            | 284 (2)                               |
| MRA <sup>c</sup>                                         | 229 (16)                          | 1,466 (12)                            |

<sup>a</sup> Included Asian, Pacific islander, American Indian, Hawaiian, and respondents with multiple races.

<sup>b</sup> Based on the VA urban/rural/highly rural (URH) classification.

<sup>c</sup> Included spironolactone and eplerenone.

**eTable 2: Use of Selected Medications over Time**

| Prior Mi/stroke<br>(n=1,455)     | Baseline         |                   | 6 months         |                   | 12 months        |                   | 18 months        |                   | 24 months        |                   |
|----------------------------------|------------------|-------------------|------------------|-------------------|------------------|-------------------|------------------|-------------------|------------------|-------------------|
|                                  | CTD<br>(n=733)   | HCTZ<br>(n=722)   | CTD<br>(n=725)   | HCTZ<br>(n=704)   | CTD<br>(N=629)   | HCTZ<br>(n=628)   | CTD<br>(n=502)   | HCTZ<br>(n=518)   | CTD<br>(n=401)   | HCTZ<br>(n=414)   |
| ACEi                             | 292<br>(40%)     | 307<br>(43%)      | 273<br>(38%)     | 294<br>(42%)      | 226<br>(36%)     | 255<br>(41%)      | 196<br>(39%)     | 208<br>(40%)      | 165<br>(41%)     | 151<br>(37%)      |
| ARB                              | 206<br>(28%)     | 204<br>(28%)      | 196<br>(27%)     | 201<br>(29%)      | 166<br>(26%)     | 179<br>(29%)      | 125<br>(25%)     | 145<br>(28%)      | 97<br>(24%)      | 115<br>(18%)      |
| ACEi or ARB                      | 496<br>(68%)     | 509<br>(71%)      | 466<br>(64%)     | 492<br>(70%)      | 391<br>(62%)     | 430<br>(69%)      | 318<br>(63%)     | 352<br>(68%)      | 260<br>(65%)     | 265<br>(64%)      |
| SGLT2i                           | 29<br>(4%)       | 34<br>(5%)        | 38<br>(5%)       | 43<br>(6%)        | 43<br>(7%)       | 57<br>(9%)        | 38<br>(8%)       | 44<br>(9%)        | 38<br>(10%)      | 38<br>(9%)        |
| MRA                              | 118<br>(16%)     | 111<br>(15%)      | 133<br>(18%)     | 120<br>(17%)      | 124<br>(20%)     | 107<br>(17%)      | 105<br>(21%)     | 89<br>(17%)       | 84<br>(21%)      | 77<br>(19%)       |
| Loop diuretics                   | 20<br>(2.7%)     | 26<br>(3.6%)      | 28<br>(3.9%)     | 42<br>(6.0%)      | 33<br>(5.2%)     | 51<br>(8.1%)      | 34<br>(6.8%)     | 49<br>(9.5%)      | 37<br>(9.2%)     | 52<br>(12.6%)     |
| No prior Mi/stroke<br>(n=12,068) | Baseline         |                   | 6 months         |                   | 12 months        |                   | 18 months        |                   | 24 months        |                   |
|                                  | CTD<br>(n=6,023) | HCTZ<br>(n=6,045) | CTD<br>(n=5,973) | HCTZ<br>(n=5,996) | CTD<br>(N=5,334) | HCTZ<br>(n=5,329) | CTD<br>(n=4,395) | HCTZ<br>(n=4,364) | CTD<br>(n=3,463) | HCTZ<br>(n=3,435) |
| ACEi                             | 2,183<br>(36%)   | 2,226<br>(37%)    | 2,111<br>(35%)   | 2,173<br>(36%)    | 1,875<br>(35%)   | 1,905<br>(36%)    | 1,493<br>(34%)   | 1,555<br>(36%)    | 1,152<br>(33%)   | 1,197<br>(35%)    |
| ARB                              | 1,692<br>(28%)   | 1,685<br>(28%)    | 1,679<br>(28%)   | 1,703<br>(29%)    | 1,509<br>(28%)   | 1,493<br>(29%)    | 1,269<br>(29%)   | 1,217<br>(28%)    | 1,008<br>(29%)   | 948<br>(28%)      |
| ACEi or ARB                      | 3,857<br>(64%)   | 3,887<br>(64%)    | 3,772<br>(63%)   | 3,856<br>(64%)    | 3,364<br>(63%)   | 3,390<br>(64%)    | 2,740<br>(62%)   | 2,760<br>(63%)    | 2,150<br>(62%)   | 2,133<br>(62%)    |
| SGLT2i                           | 144<br>(2%)      | 140<br>(2%)       | 217<br>(4%)      | 220<br>(4%)       | 226<br>(4%)      | 211<br>(4%)       | 199<br>(5%)      | 189<br>(4%)       | 171<br>(5%)      | 169<br>(5%)       |
| MRA                              | 722<br>(12%)     | 744<br>(12%)      | 792<br>(13%)     | 794<br>(13%)      | 783<br>(15%)     | 745<br>(14%)      | 643<br>(15%)     | 645<br>(15%)      | 545<br>(16%)     | 526<br>(15%)      |
| Loop diuretics                   | 119<br>(2.0%)    | 146<br>(2.4%)     | 168<br>(2.8%)    | 214<br>(3.6%)     | 220<br>(4.1%)    | 251<br>(4.7%)     | 212<br>(4.8%)    | 266<br>(6.1%)     | 199<br>(5.7%)    | 235<br>(6.8%)     |

**eFigure 1. CONSORT diagram by MI/stroke subgroup**

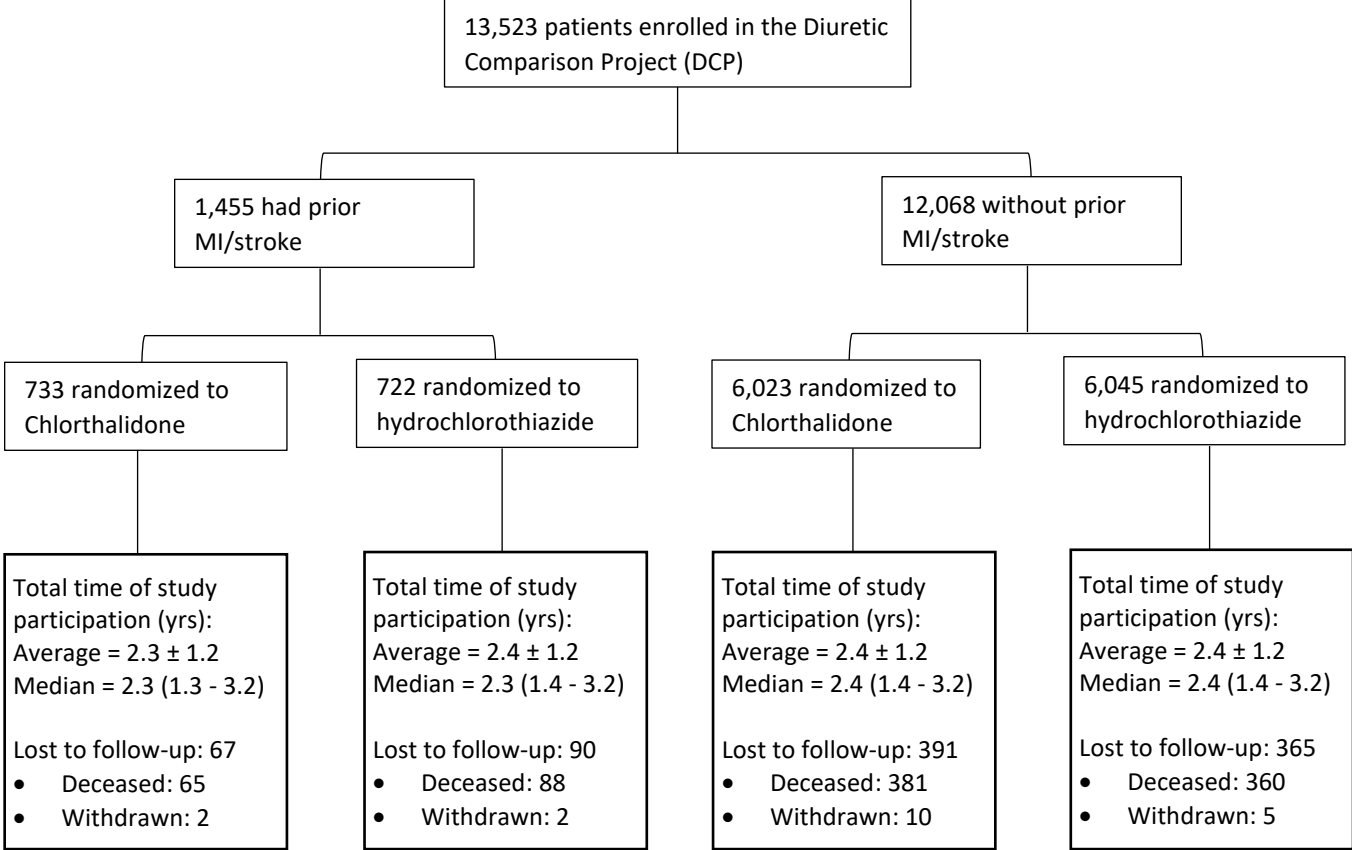

eFigure 2. Forest plot by MI/stroke subgroup

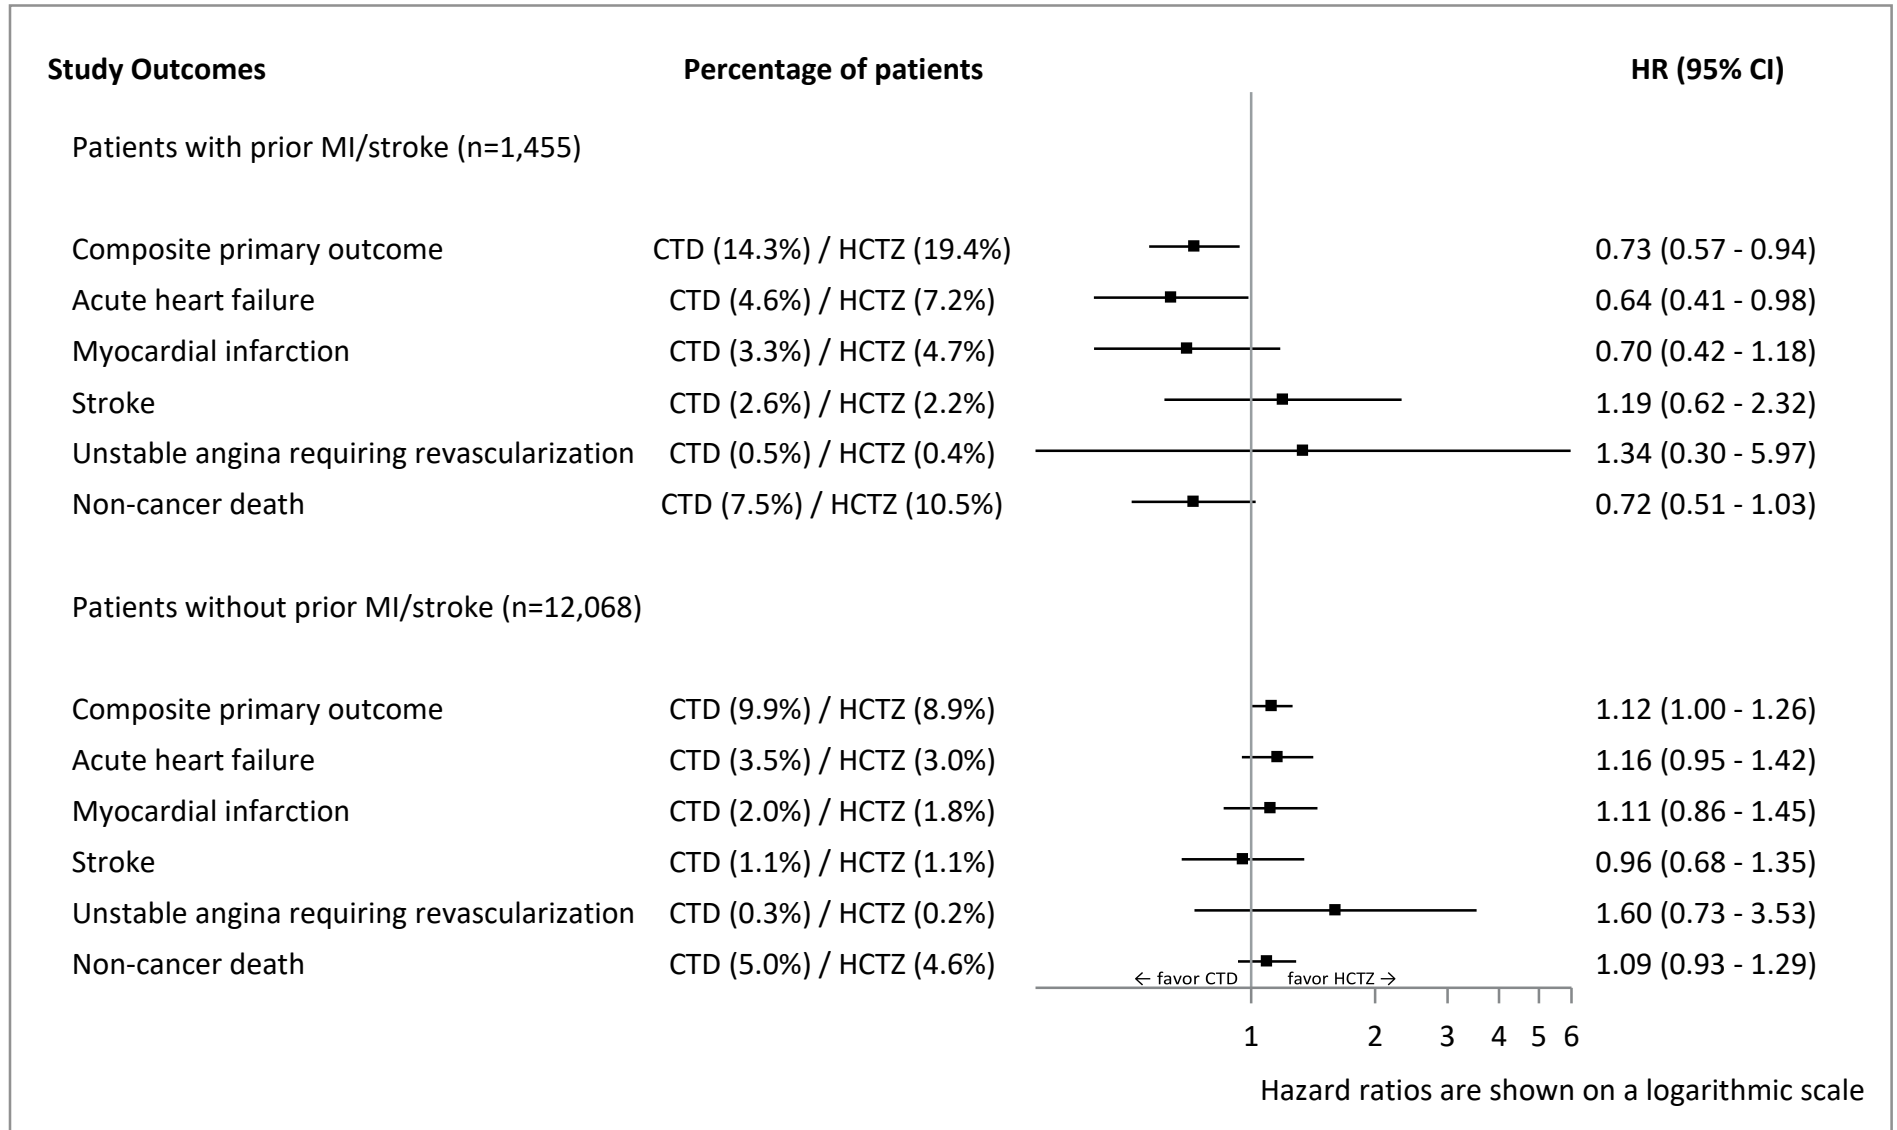

Supplement: jamanetwopen-e2411081-s002.pdf [file jamanetwopen-e2411081-s002.pdf]
