# Supplementary material for: Chlorthalidone vs Hydrochlorothiazide for Hypertension Treatment After Myocardial Infarction or Stroke: A Secondary Analysis of a Randomized Clinical Trial
Source: PubMed Central journal article supplement (PMC11094558; doi:10.1001/jamanetworkopen.2024.11081), 2024-05-14
Supplement: jamanetwopen-e2411081-s003.pdf [file jamanetwopen-e2411081-s003.pdf]

## Data Sharing Statement

Ishani. Chlorthalidone vs Hydrochlorothiazide for Hypertension Treatment After Myocardial Infarction or Stroke. *JAMA Netw Open*. Published May 14, 2024.

doi:10.1001/jamanetworkopen.2024.11081

### Data

**Data available:** No

### Additional Information

**Explanation for why data not available:** The datasets used or generated from the current study are not publicly available. De-identified, aggregated data may be provided upon request through an approved VA Data Use Agreement.
